# Supplementary material for: Quantitative Flow Ratio to Predict Nontarget Vessel–Related Events at 5 Years in Patients With ST‐Segment–Elevation Myocardial Infarction Undergoing Angiography‐Guided Revascularization
Source: PubMed Central journal article supplement — J Am Heart Assoc. 2021 Apr 26;10(9):e019052. doi: 10.1161/JAHA.120.019052 (PMC8200733; doi:10.1161/jaha.120.019052), 2021-04-26
Supplement: JAH3-10-e019052-s001.pdf [file JAH3-10-e019052-s001.pdf]

# **SUPPLEMENTAL MATERIAL**

**Table S1. Landmark Analysis of Clinical Endpoints from 1 to 5 Years.**

|                                                     | <b>QFR≤0.80</b><br><b>(N=35)</b> | <b>QFR&gt;0.80</b><br><b>(N=582)</b> | <b>HR (95% CI)</b> | <b>p-value</b> |
|-----------------------------------------------------|----------------------------------|--------------------------------------|--------------------|----------------|
| Cardiac death, non-TV-MI, non-TV<br>TVR, n (%)      | 10 (43.5)                        | 42 (7.8)                             | 6.68 (3.35-13.33)  | <0.001         |
| Cardiac death, MI (any),<br>revascularization (any) | 10 (43.5)                        | 63 (12.0)                            | 4.16 (2.14-8.12)   | <0.001         |
| Cardiac death or MI (any)                           | 4 (14.7)                         | 33 (6.1)                             | 2.53 (0.90-7.15)   | 0.079          |
| Cardiac death, TV-MI, TVR, n (%)                    | 4 (15.9)                         | 42 (7.8)                             | 2.00 (0.72-5.56)   | 0.187          |
| Death, n (%)                                        | 1 (3.1)                          | 38 (6.7)                             | 0.46 (0.06-3.32)   | 0.439          |
| Cardiac death, n (%)                                | 0 (0.0)                          | 13 (2.3)                             | -                  | -              |
| Non-TV-MI, n (%)                                    | 3 (10.0)                         | 14 (2.6)                             | 4.06 (1.17-14.12)  | 0.028          |
| Non-TV<br>TVR, n (%)                                | 10 (43.5)                        | 29 (5.4)                             | 9.75 (4.75-20.04)  | <0.001         |
| Revascularization (any), n (%)                      | 10 (43.5)                        | 50 (9.6)                             | 5.25 (2.66-10.37)  | <0.001         |
| MI (any), n (%)                                     | 4 (14.7)                         | 23 (4.3)                             | 3.65 (1.26-10.54)  | 0.017          |
| MI Q-wave, n (%)                                    | 2 (6.5)                          | 6 (1.1)                              | 6.02 (1.21-29.82)  | 0.028          |
| MI non Q-wave, n (%)                                | 3 (11.0)                         | 19 (3.6)                             | 3.18 (0.94-10.74)  | 0.063          |
| Stroke (any), n (%)                                 | 1 (3.3)                          | 9 (1.7)                              | 1.96 (0.25-15.48)  | 0.523          |

Depicted are number of patients (%) and hazard ratios (HR) with 95% confidence intervals (CI) from univariable Cox proportional hazards regressions with p-values. MI = myocardial infarction, non-TV-MI = non-target vessel myocardial infarction, non-TV  
TVR = non-target vessel revascularization, TV-MI = target vessel myocardial infarction, TVR = target vessel revascularization, QFR = Quantitative Flow Ratio.

**Table S2. Patient and Procedural Characteristics for >30% DS.**

|                                                   | <b>QFR≤0.80</b><br><b>(N=35)</b> | <b>QFR&gt;0.80</b><br><b>(N=412)</b> | <b>p-value</b> |
|---------------------------------------------------|----------------------------------|--------------------------------------|----------------|
| <b>Patient characteristics (patient-level)</b>    |                                  |                                      |                |
| Sex (female), n (%)                               | 10 (28.6)                        | 96 (23.3)                            | 0.534          |
| Age, years                                        | 63.1 ±11.4                       | 61.7 ±11.6                           | 0.499          |
| BMI, kg/m <sup>2</sup>                            | 27.3 ±3.5                        | 27.1 ±4.0                            | 0.764          |
| Diabetes mellitus, n (%)                          | 8 (22.9)                         | 59 (14.3)                            | 0.213          |
| Hypertension, n (%)                               | 22 (62.9)                        | 203 (49.3)                           | 0.159          |
| Hypercholesterolemia, n (%)                       | 25 (71.4)                        | 224 (54.8)                           | 0.075          |
| Family history of CAD, n (%)                      | 13 (38.2)                        | 122 (30.0)                           | 0.335          |
| Killip I or II, n (%)                             | 33 (94.3)                        | 409 (99.3)                           | 0.051          |
| Killip IV, n (%)                                  | 1 (2.9)                          | 2 (0.5)                              | 0.217          |
| Left ventricular function, %                      | 49.1 ±10.4                       | 48.7 ±10.5                           | 0.853          |
| MI SYNTAX Score                                   | 16.2 ±10.9                       | 11.4 ±7.71                           | <0.001         |
| <b>Procedural characteristics (patient-level)</b> |                                  |                                      |                |
| <b>Infarct vessel</b>                             |                                  |                                      | <b>0.010</b>   |
| Left main (LM), n (%)                             | 0 (0.0)                          | 1 (0.2)                              |                |
| Left anterior descending (LAD), n (%)             | 5 (14.3)                         | 165 (40.0)                           |                |
| Left circumflex (LCX), n (%)                      | 7 (20.0)                         | 62 (15.0)                            |                |
| Right coronary artery (RCA), n (%)                | 23 (65.7)                        | 184 (44.7)                           |                |
| Number of lesions in infarct vessel, n            | 1.03 ±0.17                       | 1.12 ±0.37                           | 0.141          |

**Table S2. continued**

|                                          |             |              |        |
|------------------------------------------|-------------|--------------|--------|
| <b>Type of intervention</b>              |             |              | 0.217  |
| PCI - implantation of stent(s), n (%)    | 34 (97.1)   | 410 (99.5)   |        |
| PCI - only balloon dilatation, n (%)     | 1 (2.9)     | 2 (0.5)      |        |
| Number of stents per lesion, n           | 1.37 ±0.81  | 1.43 ±0.73   | 0.642  |
| Total stent length per lesion, mm        | 28.4 ±15.5  | 27.1 ±13.4   | 0.578  |
| Average stent diameter, mm               | 3.24 ±0.44  | 3.17 ±0.41   | 0.352  |
| Direct stenting, n (%)                   | 11 (32.4)   | 112 (27.3)   | 0.552  |
| Maximal balloon pressure, atm            | 16.3 ±3.5   | 15.4 ±3.2    | 0.099  |
| Thrombus aspiration, n (%)               | 23 (65.7)   | 244 (59.2)   | 0.479  |
| <b>Non-target vessel (patient-level)</b> | <b>N=35</b> | <b>N=412</b> | <0.001 |
| Left anterior descending (LAD), n (%)    | 27 (77.1)   | 133 (32.3)   |        |
| Left circumflex (LCX), n (%)             | 1 (2.9)     | 173 (42.0)   |        |
| Right circumflex (RCA), n (%)            | 7 (20.0)    | 106 (25.7)   |        |
| DS ≥50% by 3D-QCA, n (%)                 | 23 (65.7)   | 38 (9.2)     | <0.001 |
| <b>Non-target vessel (vessel-level)</b>  | <b>N=36</b> | <b>N=542</b> | <0.001 |
| Left anterior descending (LAD), n (%)    | 28 (77.8)   | 153 (28.2)   |        |
| Left circumflex (LCX), n (%)             | 1 (2.8)     | 256 (47.2)   |        |
| Right circumflex (RCA), n (%)            | 7 (19.4)    | 133 (24.5)   |        |
| DS ≥50% by 3D-QCA, n (%)                 | 24 (66.7)   | 43 (7.9)     | <0.001 |

Values are mean±SD or n (%). BMI = body mass index, CAD = coronary artery disease, DS% = diameter stenosis, MI SYNTAX Score = Myocardial Infarction TAXus and Cardiac Surgery Score, PCI = percutaneous coronary intervention, 3D-QCA = 3D-Quantitative Coronary Angiography.

**Table S3. 3D-QCA Analysis for >30% DS.**

| <b>3D-QCA variable<br/>(patient-level)</b> | <b>QFR≤0.80<br/>(N=35)</b> | <b>QFR&gt;0.80<br/>(N=412)</b> | <b>p-value</b> |
|--------------------------------------------|----------------------------|--------------------------------|----------------|
| Diameter stenosis, %                       | 54.2 ±8.1                  | 40.1 ±7.1                      | <0.001         |
| Area stenosis, %                           | 69.9 ±8.3                  | 52.6 ±11.4                     | <0.001         |
| Lesion length, mm                          | 31.0 ±16.9                 | 22.3 ±13.8                     | <0.001         |
| Proximal diameter, mm                      | 2.77 ±0.61                 | 2.93 ±0.64                     | 0.155          |
| Minimal lumen diameter, mm                 | 1.33 ±0.37                 | 1.77 ±0.45                     | <0.001         |
| Distal diameter, mm                        | 2.46 ±0.49                 | 2.62 ±0.65                     | 0.169          |
| Reference diameter, mm                     | 2.88 ±0.54                 | 2.96 ±0.65                     | 0.486          |
| <b>3D-QCA variable<br/>(vessel-level)</b>  | <b>QFR≤0.80<br/>(N=36)</b> | <b>QFR&gt;0.80<br/>(N=542)</b> | <b>p-value</b> |
| Diameter stenosis, %                       | 54.2 ±8.0                  | 39.5 ±6.8                      | <0.001         |
| Area stenosis, %                           | 69.9 ±8.1                  | 51.9 ±11.2                     | <0.001         |
| Lesion length, mm                          | 30.4 ±17.0                 | 22.0 ±13.8                     | <0.001         |
| Proximal diameter, mm                      | 2.75 ±0.62                 | 2.92 ±0.64                     | 0.124          |
| Minimal lumen diameter, mm                 | 1.32 ±0.37                 | 1.78 ±0.44                     | <0.001         |
| Distal diameter, mm                        | 2.45 ±0.49                 | 2.60 ±0.65                     | 0.162          |
| Reference diameter, mm                     | 2.86 ±0.55                 | 2.94 ±0.65                     | 0.453          |

Values are mean±SD. DS% = diameter stenosis, QFR = Quantitative Flow Ratio,

3D-QCA = 3D-Quantitative Coronary Angiography.

**Table S4. Clinical Outcomes at 5 Years for >30% DS.**

|                                                         | <b>QFR≤0.80</b><br><b>(N=35)</b> | <b>QFR&gt;0.80</b><br><b>(N=412)</b> | <b>HR (95% CI)</b> | <b>p-value</b> |
|---------------------------------------------------------|----------------------------------|--------------------------------------|--------------------|----------------|
| Cardiac death, non-TV-MI, non-TVR, n (%)                | 22 (62.9)                        | 57 (14.0)                            | 6.61 (4.03-10.84)  | <0.001         |
| Cardiac death, MI (any), revascularization (any), n (%) | 22 (62.9)                        | 81 (19.9)                            | 4.48 (2.80-7.19)   | <0.001         |
| Cardiac death or MI (any), n (%)                        | 10 (29.6)                        | 42 (10.4)                            | 3.34 (1.67-6.65)   | 0.001          |
| Cardiac death, TV-MI, TVR, n (%)                        | 13 (37.5)                        | 53 (13.0)                            | 3.48 (1.90-6.38)   | <0.001         |
| Death, n (%)                                            | 4 (11.4)                         | 41 (10.0)                            | 1.20 (0.43-3.34)   | 0.733          |
| Cardiac death, n (%)                                    | 3 (8.6)                          | 21 (5.2)                             | 1.75 (0.52-5.86)   | 0.366          |
| Non-TV-MI, n (%)                                        | 4 (12.8)                         | 15 (3.9)                             | 3.52 (1.17-10.60)  | 0.025          |
| Non-TVR, n (%)                                          | 19 (58.6)                        | 35 (8.9)                             | 9.58 (5.46-16.79)  | <0.001         |
| Revascularization (any), n (%)                          | 19 (58.6)                        | 63 (15.8)                            | 4.99 (2.98-8.35)   | <0.001         |
| MI (any), n (%)                                         | 7 (22.4)                         | 24 (6.2)                             | 4.15 (1.79-9.64)   | 0.001          |
| MI Q-wave, n (%)                                        | 3 (9.2)                          | 4 (1.0)                              | 9.54 (2.14-42.63)  | 0.003          |
| MI non Q-wave, n (%)                                    | 5 (16.4)                         | 21 (5.4)                             | 3.24 (1.22-8.59)   | 0.018          |
| Stroke (any), n (%)                                     | 3 (9.0)                          | 7 (1.8)                              | 5.27 (1.36-20.37)  | 0.016          |

Depicted are number of patients (%) with  $\geq 1$  DS >30% and hazard ratios (HR) with 95% confidence intervals (CI) from Cox regressions with p-values. MI = myocardial infarction, non-TV-MI = non-target vessel myocardial infarction, non-TVR = non-target vessel revascularization, TV-MI = target vessel myocardial infarction, TVR = target vessel revascularization, QFR = Quantitative Flow Ratio.

**Table S5. Independent Predictor Analysis for >30% DS.**

| <b>Primary endpoint (cardiac death, non-TV-MI, non-TVR)</b>  | <b>Univariable analysis<br/>N=447<br/>HR (95% CI)</b> | <b>p-value</b> | <b>Multivariable analysis<br/>N=447<br/>HR (95% CI)</b> | <b>p-value</b> |
|--------------------------------------------------------------|-------------------------------------------------------|----------------|---------------------------------------------------------|----------------|
| Sex (female)                                                 | 1.36 (0.83-2.20)                                      | 0.219          |                                                         |                |
| Age, years<br>(per 1 year increase)                          | 1.03 (1.01-1.05)                                      | 0.001          | 1.02 (1.00-1.04)                                        | 0.047          |
| BMI, kg/m <sup>2</sup><br>(per 1 kg/m <sup>2</sup> increase) | 1.02 (0.96-1.07)                                      | 0.570          |                                                         |                |
| Diabetes mellitus                                            | 2.04 (1.23-3.39)                                      | 0.006          | 1.59 (0.89-2.86)                                        | 0.120          |
| Hypertension                                                 | 1.70 (1.08-2.69)                                      | 0.021          | 1.20 (0.71-2.04)                                        | 0.489          |
| Hypercholesterolemia                                         | 1.33 (0.84-2.10)                                      | 0.228          |                                                         |                |
| Family history of CAD                                        | 1.06 (0.66-1.71)                                      | 0.800          |                                                         |                |
| Killip III or IV                                             | 7.38 (2.33-23.40)                                     | 0.001          | 2.39 (0.55-10.50)                                       | 0.247          |
| Left ventricular function, %<br>(per 5% decrease)            | 1.29 (1.16-1.43)                                      | <0.001         | 1.28 (1.15-1.43)                                        | <0.001         |
| MI SYNTAX Score<br>(per 5 points increase)                   | 1.31 (1.17-1.47)                                      | <0.001         | 1.10 (0.95-1.26)                                        | 0.198          |
| QFR ≤0.80                                                    | 6.61 (4.03-10.84)                                     | <0.001         | 7.60 (3.85-15.04)                                       | <0.001         |
| DS ≥50% by 3D-QCA                                            | 2.27 (1.36-3.81)                                      | 0.002          | 0.64 (0.31-1.36)                                        | 0.247          |

Results from univariable and multivariable Cox proportional analyses for patients with ≥1 DS >30%. Depicted are estimated hazard ratios (HR) with 95% confidence intervals (CI) of the primary endpoint (cardiac death, non-TV-MI, non-TVR) for patient baseline characteristics, QFR ≤0.80, and DS ≥50% by 3D-QCA. Multivariable analysis was performed for variables with a significant association with the primary endpoint in univariable analysis. BMI = body mass index, CAD = coronary artery disease, DS% = diameter stenosis by 3D-QCA, MI SYNTAX Score = Myocardial Infarction TAXus and Cardiac Surgery Score, non-TV-MI = non-target vessel myocardial infarction, non-TVR = non-target vessel revascularization, QFR = Quantitative Flow Ratio, 3D-QCA = 3D-Quantitative Coronary Angiography.

**Table S6. Landmark Analysis of Clinical Endpoints from 1 to 5 Years for >30% DS.**

|                                                  | <b>QFR≤0.80</b><br><b>(N=35)</b> | <b>QFR&gt;0.80</b><br><b>(N=412)</b> | <b>HR (95% CI)</b> | <b>p-value</b> |
|--------------------------------------------------|----------------------------------|--------------------------------------|--------------------|----------------|
| Cardiac death, non-TV-MI, non-TV-R, n (%)        | 10 (43.5)                        | 42 (7.8)                             | 6.68 (3.35-13.33)  | <0.001         |
| Cardiac death, MI (any), revascularization (any) | 10 (43.5)                        | 63 (12.0)                            | 4.16 (2.14-8.12)   | <0.001         |
| Cardiac death or MI (any)                        | 4 (14.7)                         | 33 (6.1)                             | 2.53 (0.90-7.15)   | 0.079          |
| Cardiac death, TV-MI, TVR, n (%)                 | 4 (15.9)                         | 42 (7.8)                             | 2.00 (0.72-5.56)   | 0.187          |
| Death, n (%)                                     | 1 (3.1)                          | 38 (6.7)                             | 0.46 (0.06-3.32)   | 0.439          |
| Cardiac death, n (%)                             | 0 (0.0)                          | 13 (2.3)                             | -                  | -              |
| Non-TV-MI, n (%)                                 | 3 (10.0)                         | 14 (2.6)                             | 4.06 (1.17-14.12)  | 0.028          |
| Non-TV-R, n (%)                                  | 10 (43.5)                        | 29 (5.4)                             | 9.75 (4.75-20.04)  | <0.001         |
| Revascularization (any), n (%)                   | 10 (43.5)                        | 50 (9.6)                             | 5.25 (2.66-10.37)  | <0.001         |
| MI (any), n (%)                                  | 4 (14.7)                         | 23 (4.3)                             | 3.65 (1.26-10.54)  | 0.017          |
| MI Q-wave, n (%)                                 | 2 (6.5)                          | 6 (1.1)                              | 6.02 (1.21-29.82)  | 0.028          |
| MI non Q-wave, n (%)                             | 3 (11.0)                         | 19 (3.6)                             | 3.18 (0.94-10.74)  | 0.063          |
| Stroke (any), n (%)                              | 1 (3.3)                          | 9 (1.7)                              | 1.96 (0.25-15.48)  | 0.523          |

Depicted are number of patients (%) with  $\geq 1$  DS >30% and hazard ratios (HR) with 95% confidence intervals (CI) from Cox regressions with p-values. MI = myocardial infarction, non-TV-MI = non-target vessel myocardial infarction, non-TV-R = non-target vessel revascularization, TV-MI = target vessel myocardial infarction, TVR = target vessel revascularization, QFR = Quantitative Flow Ratio.



**Table S7. Diagnostic Ability of QFR  $\leq 0.80$  for the Prediction of the Primary Endpoint for Different DS%.**

|                              | <b>All DS%</b><br>(N=617) | <b>DS&gt;25%</b><br>(N=541) | <b>DS&gt;30%</b><br>(N=447) | <b>DS&gt;40%</b><br>(N=227) | <b>DS&gt;50%</b><br>(N=64) |
|------------------------------|---------------------------|-----------------------------|-----------------------------|-----------------------------|----------------------------|
| QFR (mean)                   | 0.93 $\pm$ 0.09           | 0.92 $\pm$ 0.09             | 0.91 $\pm$ 0.1              | 0.85 $\pm$ 0.11             | 0.76 $\pm$ 0.15            |
| Diameter stenosis, %         | 36.5 $\pm$ 10.5           | 38.7 $\pm$ 9.1              | 41.1 $\pm$ 8.2              | 47.4 $\pm$ 6.6              | 55.8 $\pm$ 5.8             |
| Accuracy, %                  | 86.2                      | 86.0                        | 84.3                        | 79.7                        | 78.1                       |
| Sensitivity, %               | 23.4                      | 25.9                        | 27.8                        | 40.0                        | 76.1                       |
| Specificity, %               | 97.5                      | 97.1                        | 96.5                        | 92.4                        | 79.1                       |
| Positive predictive value, % | 62.9                      | 62.9                        | 62.9                        | 62.9                        | 64.0                       |
| Negative predictive value, % | 87.6                      | 87.5                        | 86.2                        | 82.8                        | 87.2                       |

Values are mean $\pm$ SD. DS% = diameter stenosis, QFR = Quantitative Flow Ratio.

**Table S8. 3D-QCA and QFR in Treated vs. Untreated Non-Target Vessels.**

| <b>QFR and 3D-QCA variable<br/>(vessel-level)</b> | <b>Treated<br/>non-TV<br/>(N=89)</b> | <b>Untreated<br/>non-TV<br/>(N=946)</b> | <b>p-value</b> |
|---------------------------------------------------|--------------------------------------|-----------------------------------------|----------------|
| QFR                                               | 0.80 ±0.11                           | 0.95 ±0.08                              | <0.001         |
| Diameter stenosis, %                              | 54.2 ±12.4                           | 34.1 ±10.4                              | <0.001         |
| Area stenosis, %                                  | 70.7 ±14.7                           | 43.5 ±16.2                              | <0.001         |
| Lesion length, mm                                 | 19.8 ±10.9                           | 19.1 ±13.5                              | 0.609          |
| Proximal diameter, mm                             | 2.74 ±0.63                           | 2.85 ±0.63                              | 0.122          |
| Minimal lumen diameter, mm                        | 1.23 ±0.42                           | 1.90 ±0.52                              | <0.001         |
| Distal diameter, mm                               | 2.43 ±0.57                           | 2.59 ±0.64                              | 0.024          |
| Reference diameter, mm                            | 2.69 ±0.59                           | 2.88 ±0.66                              | 0.009          |

Values are mean±SD. DS% = diameter stenosis, non-TV = non-target vessel, QFR =

Quantitative Flow Ratio, 3D-QCA = 3D-Quantitative Coronary Angiography.

**Table S9. Angiography-based Treatment Decision for Non-Target Vessels vs. QFR Measurement.**

| <b>Angiography-based treatment decision</b> | <b>QFR <math>\leq 0.80</math></b> | <b>QFR <math>&gt; 0.80</math></b> | <b>Total</b> |
|---------------------------------------------|-----------------------------------|-----------------------------------|--------------|
| Treated non-TV, n (%)                       | 44 (49.4)                         | 45 (50.6)                         | 89 (100)     |
| Untreated non-TV, n (%)                     | 36 (3.8)                          | 910 (96.2)                        | 946 (100)    |

Values are n (%) vessels. Non-TV = non-target vessel, QFR = Quantitative Flow Ratio.

**Table S10. Baseline QFR and 3D-QCA Values of Vessels with a Non-TVR Event.**

| <b>QFR and 3D-QCA variable<br/>(vessel-level)</b> | <b>DS% <math>\geq</math>50% by 2D-<br/>QCA with ischemia<br/>(N= 36)</b> | <b>DS% <math>\geq</math>70% by 2D-<br/>QCA<br/>(N=15)</b> | <b>p-value</b> |
|---------------------------------------------------|--------------------------------------------------------------------------|-----------------------------------------------------------|----------------|
| QFR                                               | 0.84 $\pm$ 0.13                                                          | 0.86 $\pm$ 0.14                                           | 0.678          |
| Diameter stenosis, %                              | 42.0 $\pm$ 9.1                                                           | 41.7 $\pm$ 11.6                                           | 0.918          |
| Area stenosis, %                                  | 57.5 $\pm$ 11.9                                                          | 58.6 $\pm$ 14.1                                           | 0.757          |
| Lesion length, mm                                 | 22.5 $\pm$ 15.3                                                          | 28.1 $\pm$ 17.4                                           | 0.260          |
| Proximal diameter, mm                             | 2.70 $\pm$ 0.55                                                          | 2.82 $\pm$ 0.71                                           | 0.496          |
| Minimal lumen diameter, mm                        | 1.66 $\pm$ 0.37                                                          | 1.86 $\pm$ 0.38                                           | 0.086          |
| Distal diameter, mm                               | 2.49 $\pm$ 0.49                                                          | 2.60 $\pm$ 0.50                                           | 0.486          |
| Reference diameter, mm                            | 2.87 $\pm$ 0.54                                                          | 3.21 $\pm$ 0.47                                           | 0.036          |

Values are mean $\pm$ SD. Shown are QFR and 3D-QCA values calculated from the baseline angiography according to DS%  $\geq$ 50% by 2D-QCA with ischemia or DS%  $\geq$ 70% by 2D-QCA at the timepoint of the non-TVR event. DS% = diameter stenosis, non-TV = non-target vessel, QFR = Quantitative Flow Ratio, 3D-QCA = 3D-Quantitative Coronary Angiography.

**Figure S1. Distribution of DS% (vessel-level).**

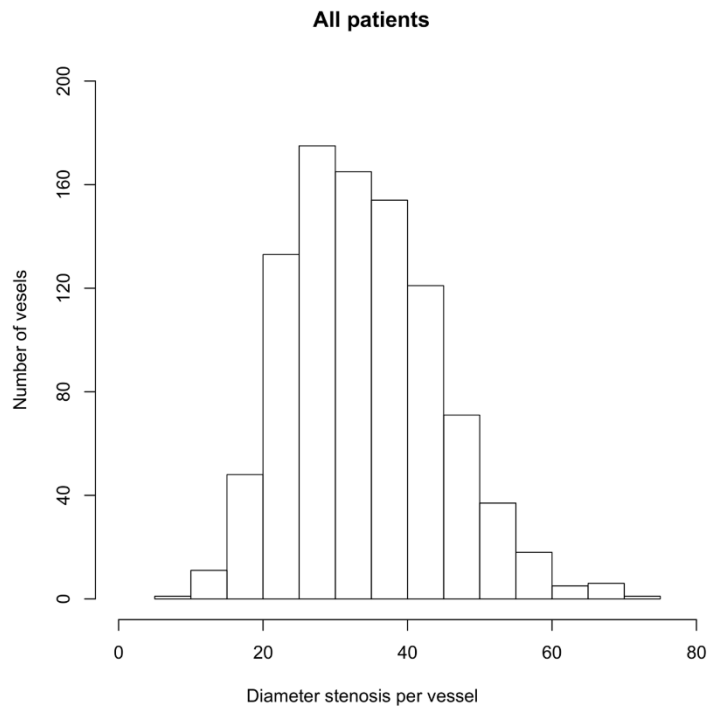

Distribution of DS% on vessel-level (n=946). DS% = diameter stenosis.

**Figure S2. Distribution of QFR Values (vessel-level).**

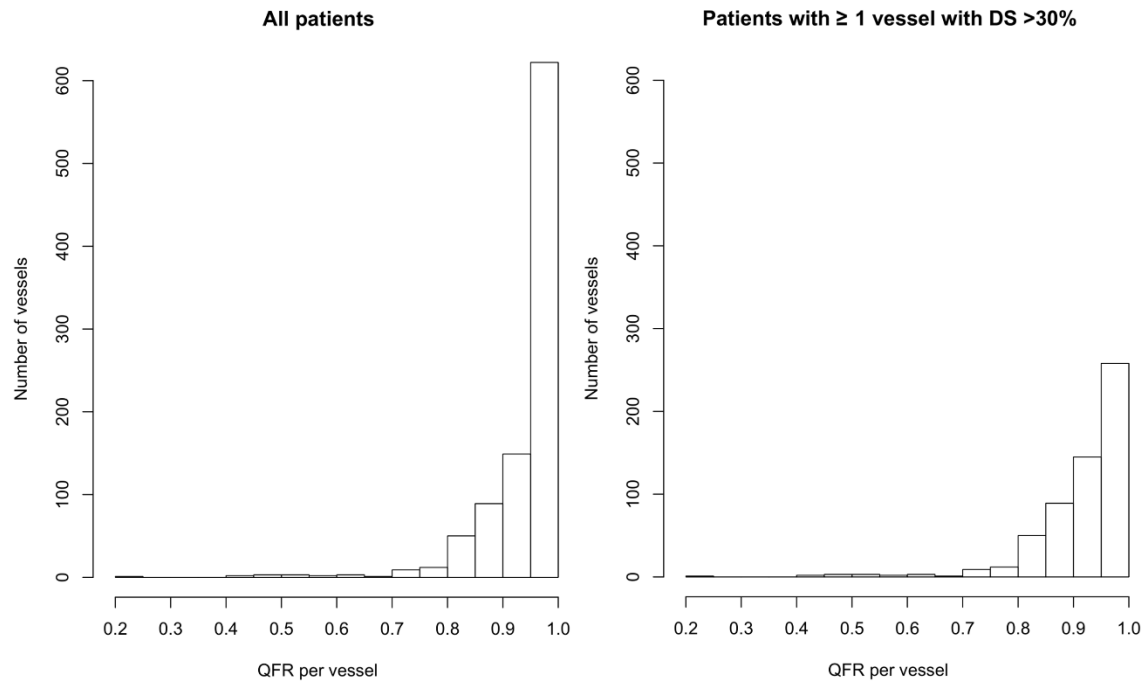

Distribution of QFR values on vessel-level for whole study cohort (n=946) (left) and  $>30\%$  stenosis (n=578) (right). DS% = diameter stenosis, QFR = Quantitative Flow Ratio.

**Figure S3. ROC Analyses for the Prediction of the Primary Endpoint for Different DS%.**

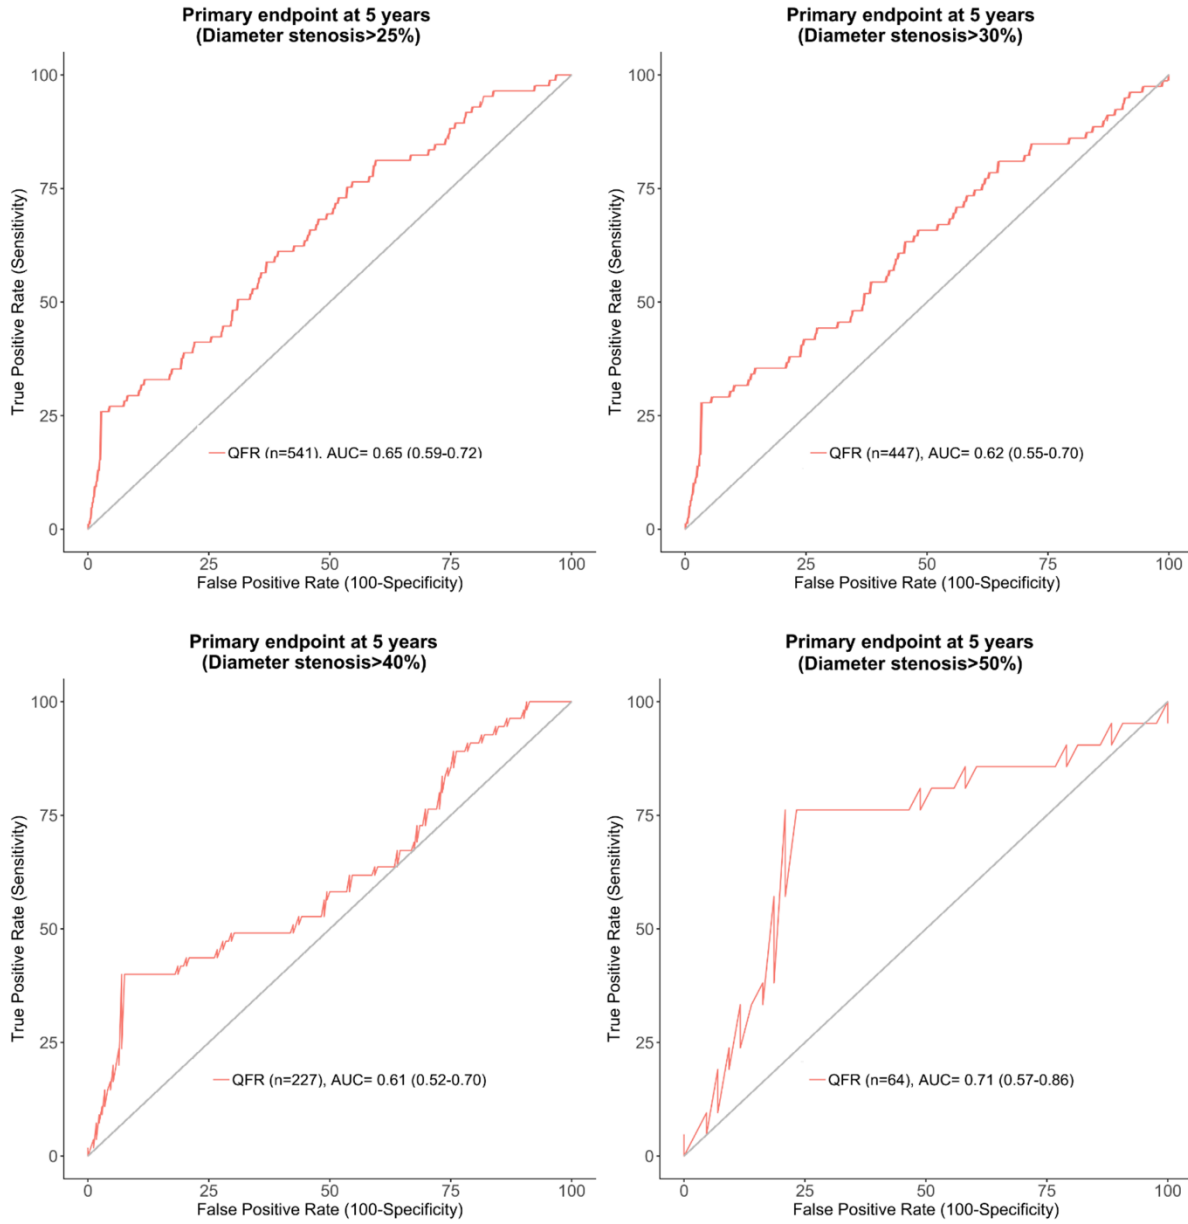

AUC = area under the curve, DS% = diameter stenosis, QFR = Quantitative Flow

Ratio.

**Figure S4. Kaplan Meier Curves of the Primary Endpoint for DS >30%.**

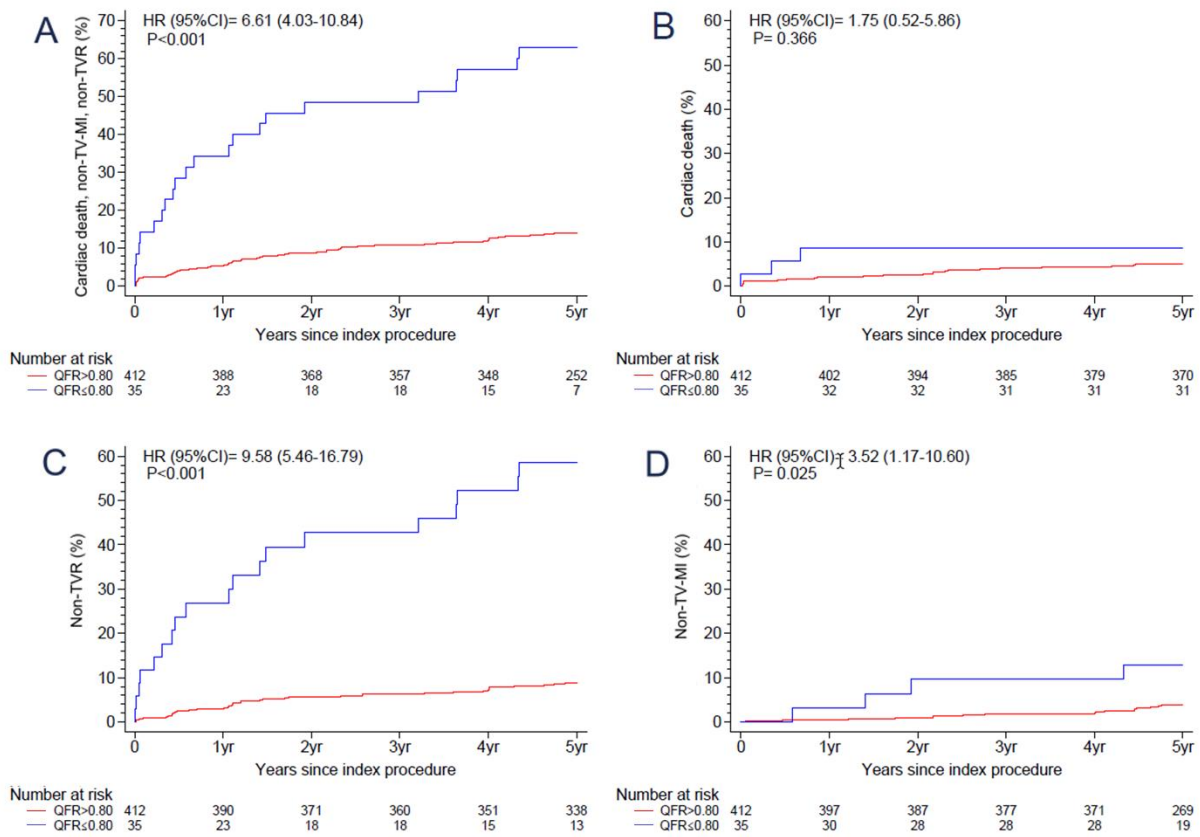

Cumulative incidence curves from Cox proportional hazards models through 5 years for patients with  $\geq 1$  DS >30% (n=447). A) primary endpoint: cardiac death, spontaneous non-TV-MI and non-TVR, B) cardiac death, C) non-TVR, D) spontaneous non-TV-MI. CI = confidence interval, HR = hazard ratio, non-TV-MI = non-target-vessel myocardial infarction, non-TVR = non-target vessel revascularization, QFR = Quantitative Flow Ratio.



**Figure S5. Time-dependent ROC analyses.**

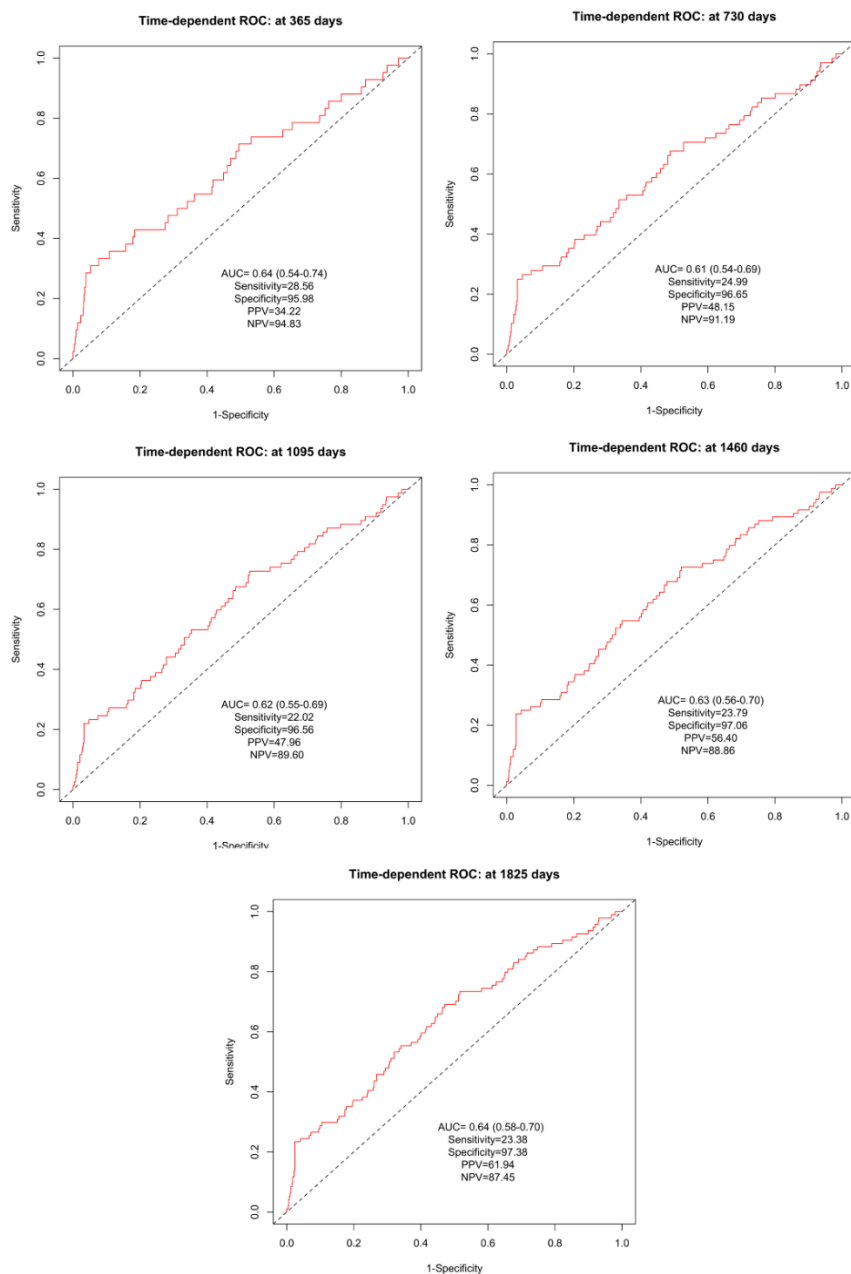

Displayed are time-dependent ROC (i.e. cumulative case/dynamic control) analyses at 1 year (365 days), 2 years (730 days), 3 years (1095 days), 4 years (1460 days), and 5 years (1825 days) for QFR  $\leq 0.80$  predicting the primary endpoint (cardiac death, spontaneous non-TV-MI, non-TVR). AUC = area under the curve, NPV = negative predictive value, PPV = positive predictive value, QFR = Quantitative Flow Ratio, ROC = receiver operating curve.

**Figure S6. ROC analyses for QFR  $\leq 0.80$  and DS  $\geq 50\%$ .**

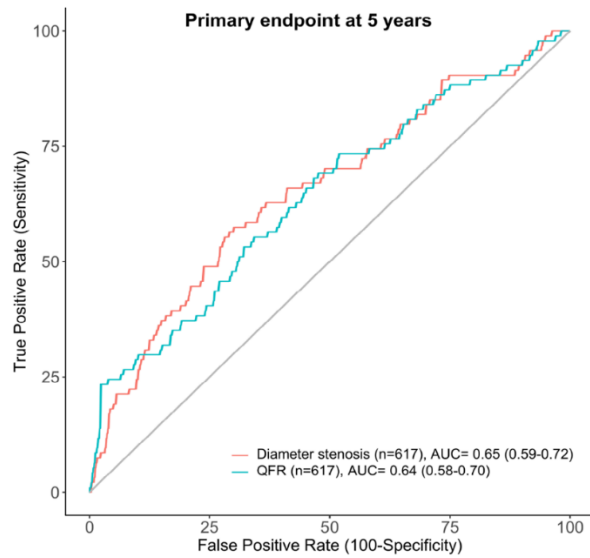

|                       | <b>QFR</b> | <b>DS</b> |
|-----------------------|------------|-----------|
| <b>Cut-off</b>        | 0.80       | 50%       |
| <b>Accuracy, %</b>    | 86.2       | 81.2      |
| <b>Sensitivity, %</b> | 23.4       | 22.3      |
| <b>Specificity, %</b> | 97.5       | 91.8      |
| <b>PPV, %</b>         | 62.9       | 32.8      |
| <b>NPV, %</b>         | 87.6       | 86.8      |

ROC analyses for QFR  $\leq 0.80$  vs. DS  $\geq 50\%$  by 3D-QCA predicting the primary endpoint (cardiac death, spontaneous, non-TV-MI, non-TVR) at 5 years. AUC = area under the curve, DS% = diameter stenosis, NPV = negative predictive value, PPV = positive predictive value, QFR = Quantitative Flow Ratio, ROC = receiver operating curve. 3D-QCA = 3D-Quantitative Coronary Angiography.

**Figure S7. Flowchart of Treated Non-Target-Vessels.**

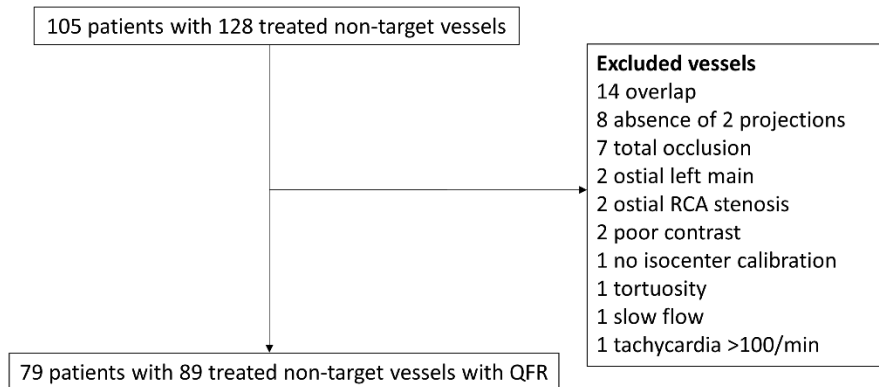

QFR = Quantitative Flow Ratio, RCA = right coronary artery.

**Figure S8. Distribution of DS% and QFR of Treated Non-Target-Vessels.**

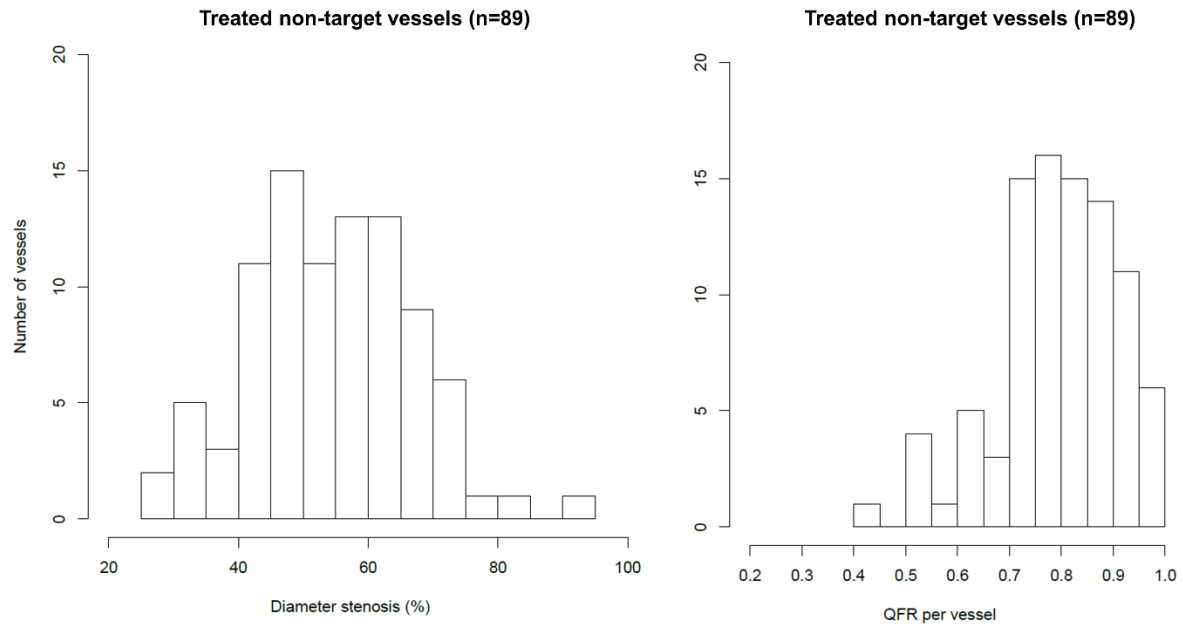

DS% = diameter stenosis. QFR = Quantitative Flow Ratio.

**Figure S9. Scatterplot DS% vs. QFR of Treated Non-Target-Vessels.**

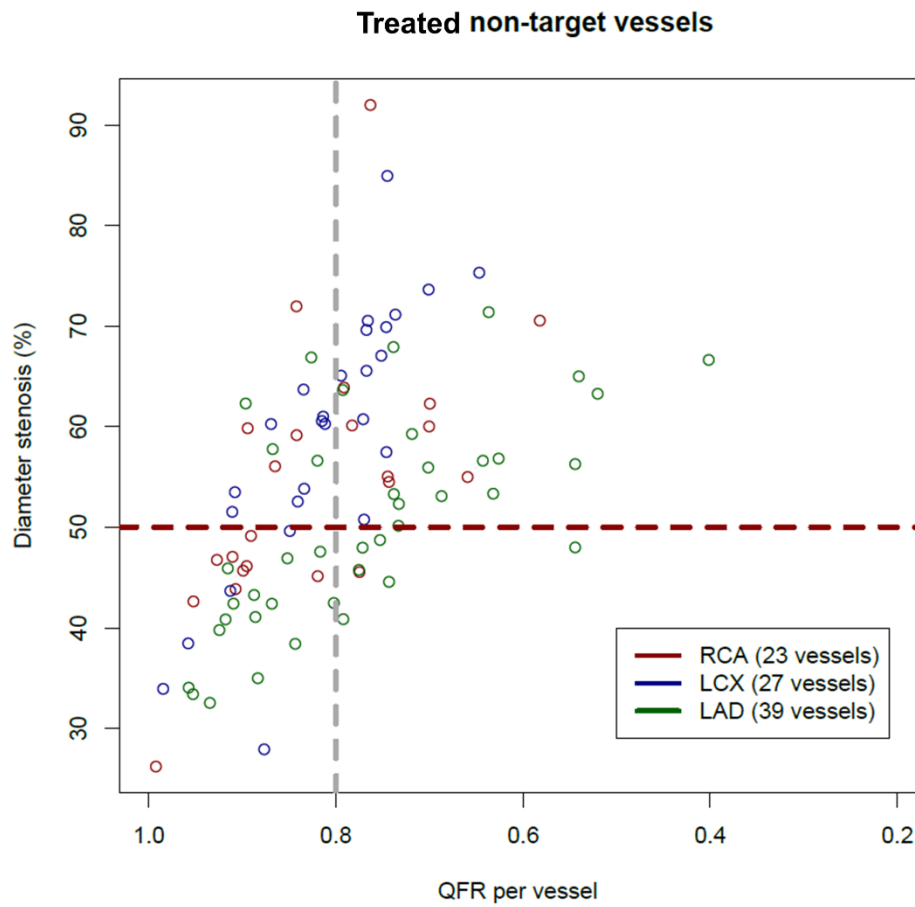

DS% = diameter stenosis, LAD = left anterior descending artery, LCX = left circumflex artery, QFR = Quantitative Flow Ratio, RCA = right coronary artery.

**Figure S10. Flowchart of Matched 2D-QCA and QFR of Vessels with a Non-TVR Event.**

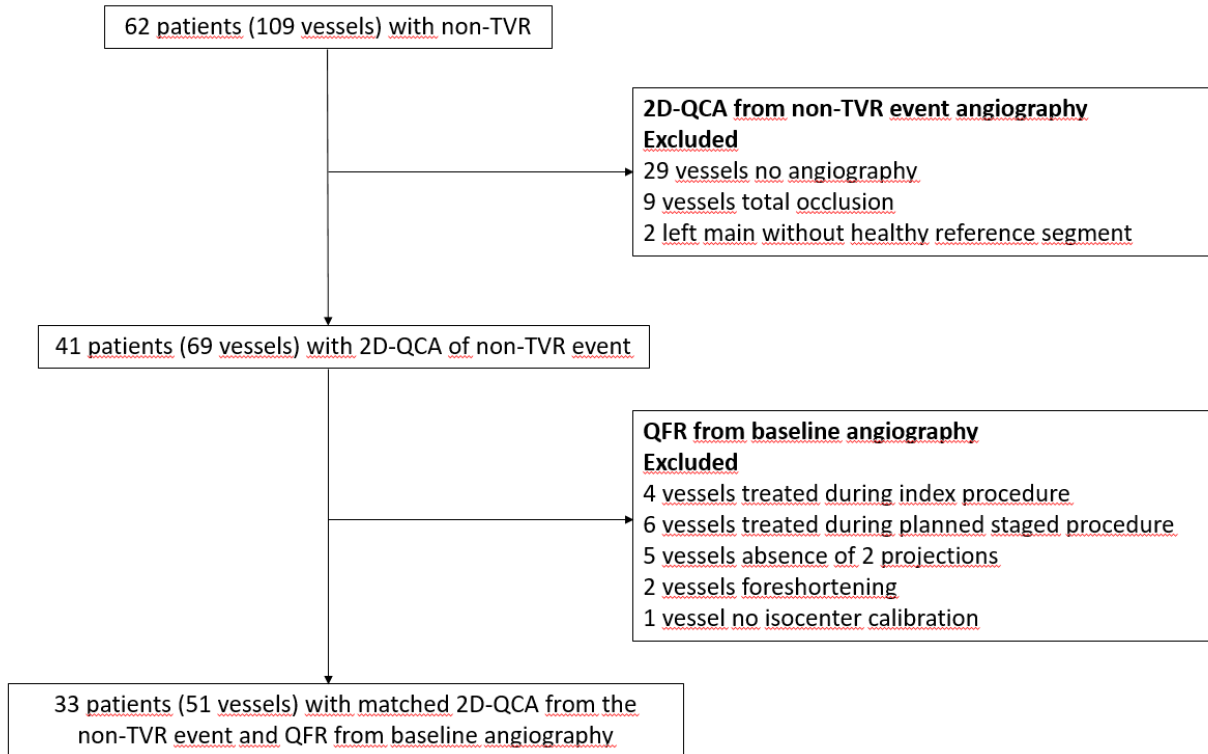

Non-TVR = non-target vessel revascularization, 2D-QCA = 2D-Quantitative Coronary Angiography, QFR = Quantitative Flow Ratio.
